# Supplementary material for: An effective combination of whole-exome sequencing and runs of homozygosity for the diagnosis of primary ciliary dyskinesia in consanguineous families
Source: PubMed Central journal article supplement (PMC5554225; doi:10.1038/s41598-017-08510-z), 2017-08-11
Supplement: 41598_2017_8510_MOESM1_ESM.pdf [file 41598_2017_8510_MOESM1_ESM.pdf]

**An effective combination of whole-exome sequencing and runs of homozygosity for the diagnosis of primary ciliary dyskinesia in consanguineous families**

Ting Guo<sup>1,2,3#</sup>, Zhi-Ping Tan<sup>4,5#</sup>, Hua-Mei Chen<sup>6</sup>, Dong-yuan Zheng<sup>1,2,3</sup>, Lv liu<sup>1,2,3</sup>, Xin-Gang Huang<sup>1,2,3</sup>,  
Ping Chen<sup>1,2,3</sup>, Hong Luo<sup>1,2,3 \*</sup> and Yi-Feng Yang<sup>4, 5\*</sup>

1. Department of Respiratory Medicine, the Second Xiangya Hospital , Central South University, Changsha, Hunan 410011, China.
2. Research Unit of Respiratory Disease, Central South University, Changsha, Hunan 410011, China.
3. Diagnosis and Treatment Center of Respiratory Disease, Central South University, Changsha, Hunan 410011, China.
4. Clinical Center for Gene Diagnosis and Therapy of State Key Laboratory of Medical Genetics, the Second Xiangya Hospital ,Central South University, Changsha, Hunan 410011, China.
5. Department of Cardiovascular Surgery, the Second Xiangya Hospital, Central South University, Changsha, Hunan 410011, China
6. Department of Respiratory Medicine, Chang Sha Central Hospital, Changsha, Hunan 410011, China.

<sup>#</sup>Ting Guo and Zhi-Ping Tan contributed equally to this article.

\* Correspondence to: Hong Luo (Luohong1003@163.com) or Yi-Feng Yang (yyf627@163.com)

## Supplementary Figure 1

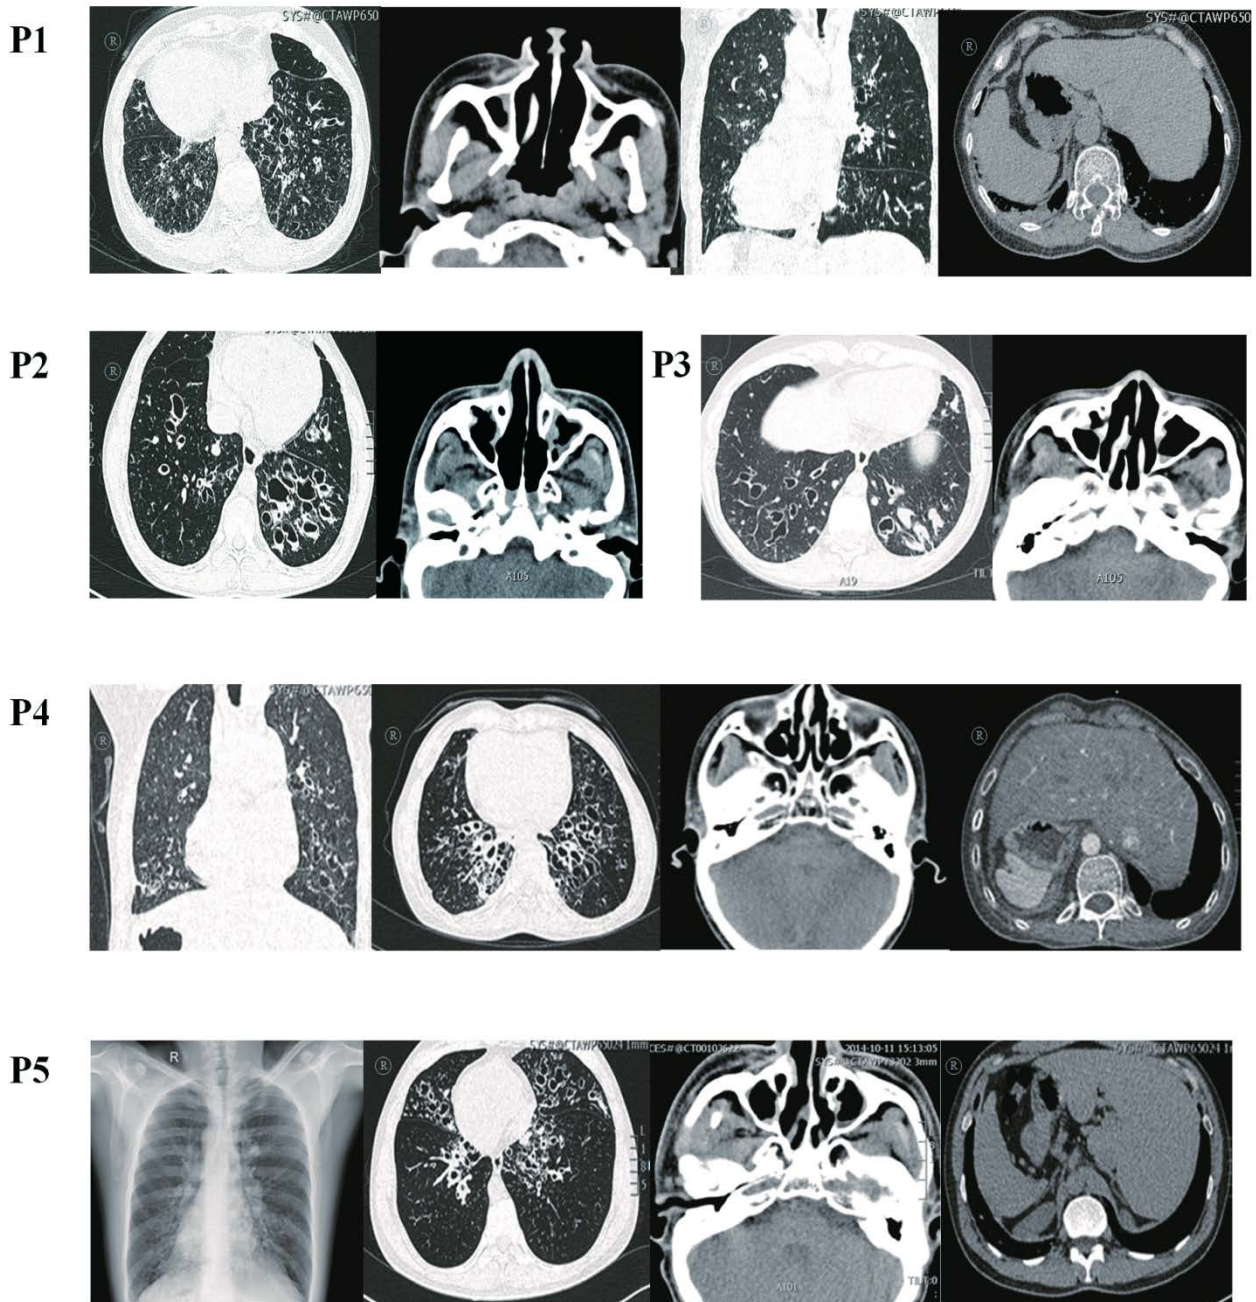

### Supplementary Figure 1. Clinical features of PCD patients in our study

P1 (family1:IV-4), P2 (family2:IV-1), P3 (family2:IV-2), P4 (family3:IV-2) and P5 (family3:IV-3) represent the proband in each family, respectively. The patients presented classical clinical features including bronchiectasis, chronic rhinosinusitis or laterality defect (except for P2 and P3), as suggested by x-ray and CT scan.

## Supplementary Figure 2

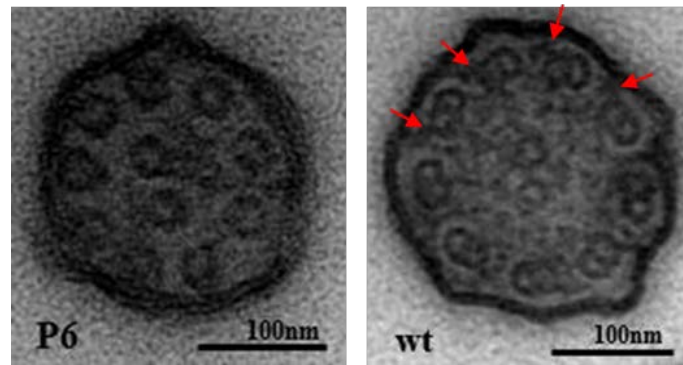

### Supplementary Figure 2. Ciliary ultrastructure by electron microscope for P6

The ciliary ultrastructures of P6 and the control were shown. Arrows (in red) indicate some visible ODA structures. Due to confounding factors, the repeated results are vague and equivocal; scale bar, 100 nm

### Supplementary Figure 3

Exome sequencing and filter procedure

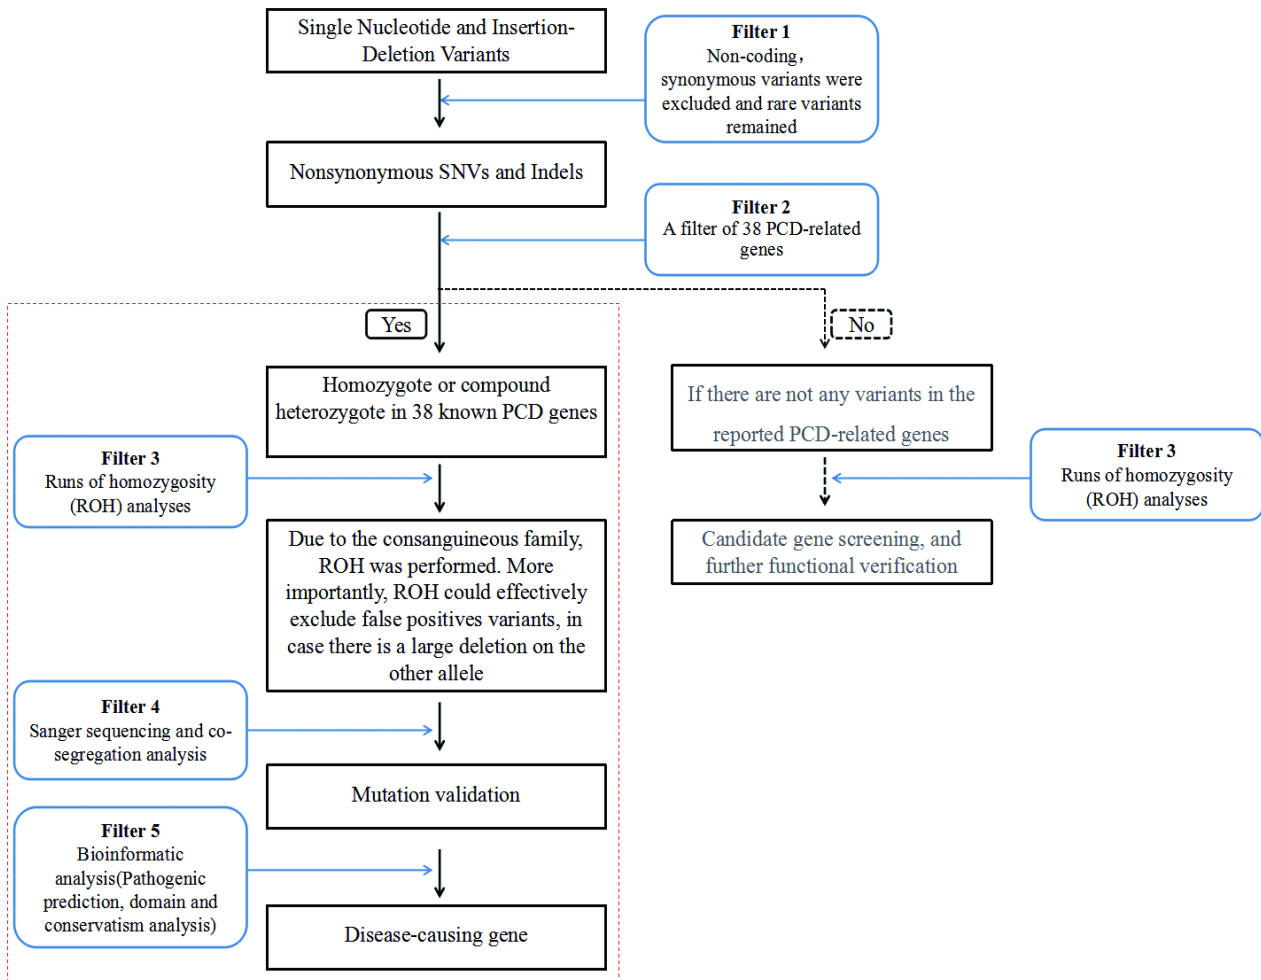

### Supplementary Figure 3. Exome sequencing and filter procedure

Schematic representation of the filter strategies employed in our study.

## Supplementary Figure 4

### A

#### ARMC4

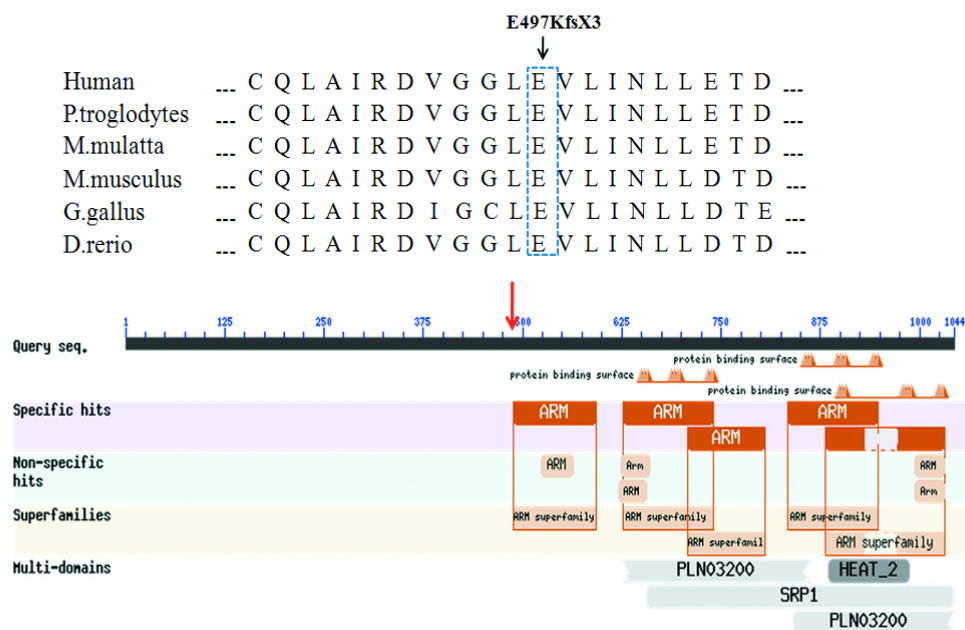

### B

#### CCNO

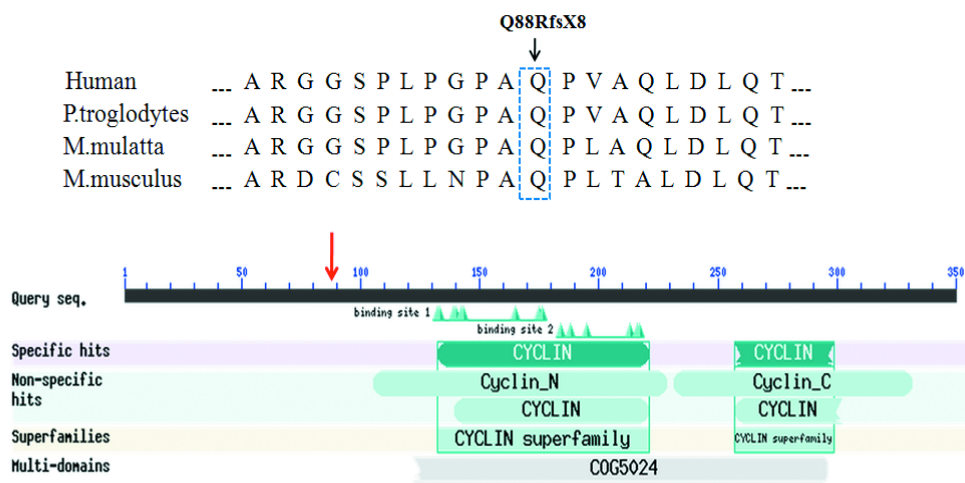

**C****DYX1C1**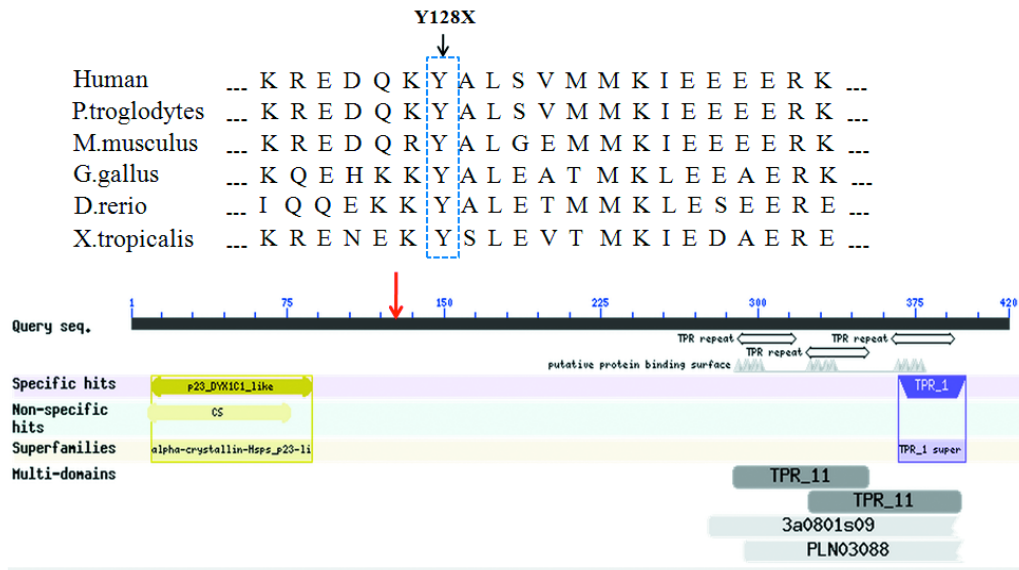**D****DNAI1**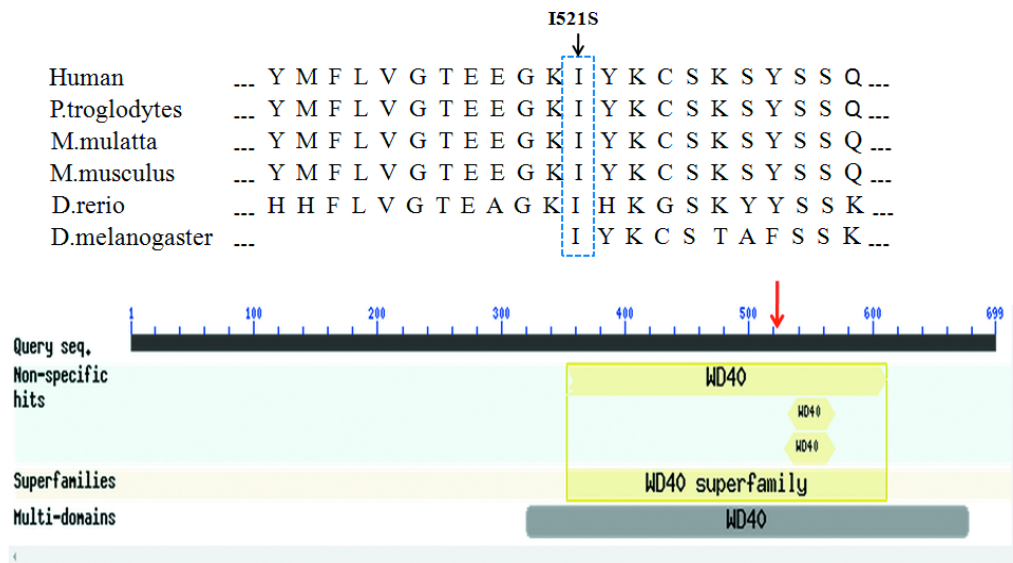**Supplementary Figure 4. The identification of conservatism and mutation domain**

(A) The glutamic acid at position 497 in ARMC4 protein was highly conserved in diverse species (from MutationTaster). This frameshift mutation (c.1488delG/p.E497Kfs\*3) was located in the ARMs domain (from NCBI Conserved Domain Search) and would result in premature protein truncation (from MutationTaster). (B) Alignment of multiple CCNO protein sequences across species. The Q88 affected amino acid is located in the highly conserved amino acid region in different species (from MutationTaster).

The mutation (c.248\_249insGCCCG/p.Q88Rfs\*8) would result in premature CCNO protein truncation, which affects the key domain--the cyclin domain (from NCBI Conserved Domain Search). (C) The residue Tyr128 in DYX1C1 protein is highly evolutionarily conserved in diverse species (from MutationTaster). Y128\* would result in premature DYX1C1 protein truncation, which affects the key domain--the TPR domain(from NCBI Conserved Domain Search). (D) The isoleucine at position 521 in DNAI1 protein highly conserved in diverse species (from MutationTaster). I521 is located in the WD40 domain(from NCBI Conserved Domain Search), which plays an important role in ciliary dysfunction.

## Supplementary Figure 5

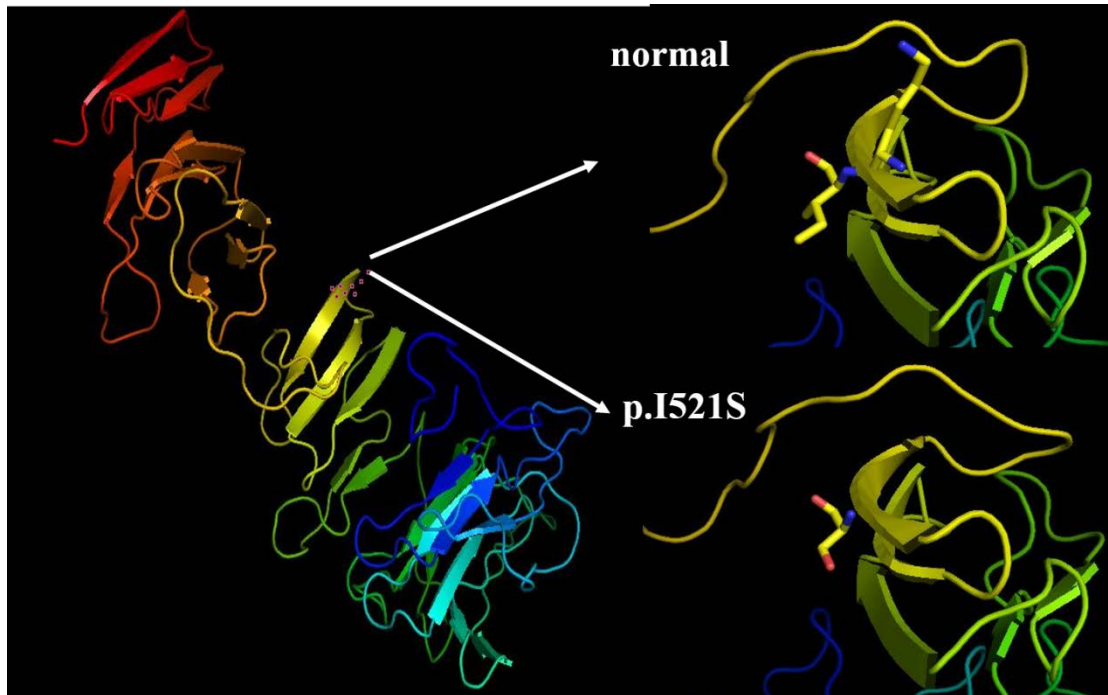

**Supplementary Figure 5. Protein structure prediction of c.1562T>G/p.I521S in DNAI1**

This figure shows the obvious difference between the mutant (p.I521S) and the wild type (by Swiss Model).



**Supplementary Table S1: Summary of SNPs for exome captured samples and filter procedure**

|                                                | Family 1 | Family 2 |          | Family 3 |          | Family 4 |          |
|------------------------------------------------|----------|----------|----------|----------|----------|----------|----------|
|                                                | IV-4*    | IV-1*    | IV-2*    | IV-2*    | IV-3*    | IV-5*    | V-1      |
| <b>Exome Capture Statistics</b>                |          |          |          |          |          |          |          |
| Raw data(G)                                    | 7.88     | 5.65     | 4.9      | 8.63     | 8.23     | 5.46     | 6.48     |
| Total reads (Clean reads)                      | 52036638 | 43603310 | 37806418 | 66364436 | 63182192 | 41458944 | 49066882 |
| Total_effective_reads                          | 52022905 | 43540869 | 37775699 | 66366715 | 63180861 | 41345878 | 48886021 |
| Effective_sequences_on_target(Mb)              | 4780.02  | 3433.06  | 2996.41  | 5563.37  | 5316.98  | 3365.95  | 4071.21  |
| Fraction_of_effective_bases_on_target          | 61.8%    | 63.3%    | 63.7%    | 67.4%    | 67.6%    | 65.5%    | 67.0%    |
| Average_sequencing_depth_on_target             | 94.86    | 68.13    | 59.46    | 110.40   | 105.52   | 66.80    | 80.79    |
| Base_covered_on_target                         | 50270523 | 50305471 | 50235525 | 50304372 | 50254766 | 50233534 | 50293815 |
| Coverage_of_target_region                      | 99.8%    | 99.8%    | 99.7%    | 99.8%    | 99.7%    | 99.7%    | 99.8%    |
| Fraction of target covered $\geq 4\times$ (%)  | 99.6%    | 99.4%    | 99.2%    | 99.6%    | 99.4%    | 99.2%    | 99.4%    |
| Fraction of target covered $\geq 10\times$ (%) | 99.0%    | 97.8%    | 97.0%    | 98.8%    | 98.6%    | 97.3%    | 97.8%    |
| Fraction of target covered $\geq 20\times$ (%) | 96.8%    | 92.1%    | 89.8%    | 96.6%    | 96.3%    | 91.2%    | 93.1%    |
| <b>SNPs for exome capture</b>                  |          |          |          |          |          |          |          |
| <b>Total number of SNVs</b>                    | 105171   | 36253    | 36168    | 36385    | 36156    | 35866    | 36511    |
| Missense                                       | 8693     | 7885     | 7860     | 7804     | 7838     | 7760     | 7945     |
| Nonsense                                       | 61       | 50       | 55       | 51       | 55       | 41       | 48       |
| Splice site                                    | 2124     | 1562     | 1578     | 1605     | 1574     | 1549     | 1566     |
| Synonymous-coding                              | 9980     | 9163     | 9166     | 9159     | 9147     | 9104     | 9215     |
| Hom                                            | 46434    | 15680    | 15544    | 15597    | 15610    | 15669    | 15288    |
| Het                                            | 58737    | 20573    | 20624    | 20788    | 20546    | 20197    | 21223    |
| <b>Total number of indels</b>                  | 12960    | 2291     | 2326     | 2446     | 2460     | 2368     | 2412     |
| frameshift_deletion                            | 79       | 65       | 65       | 65       | 67       | 74       | 67       |
| frameshift_insertion                           | 54       | 39       | 46       | 43       | 44       | 45       | 43       |
| nonframeshift_deletion                         | 165      | 101      | 105      | 89       | 87       | 87       | 92       |
| nonframeshift_insertion                        | 158      | 95       | 100      | 93       | 105      | 102      | 106      |
| stopgain                                       | 6        | 3        | 2        | 5        | 5        | 3        | 4        |
| Hom                                            | 6858     | 1289     | 1275     | 1348     | 1368     | 1332     | 1315     |
| Het                                            | 6102     | 1002     | 1051     | 1098     | 1092     | 1036     | 1097     |

| <b>Filter procedure</b>                    |   |   |   |   |
|--------------------------------------------|---|---|---|---|
| Homozygote in PCD-related genes            | 1 | 1 | 1 | 1 |
| Compound heterozygote in PCD-related genes | 0 | 0 | 0 | 0 |
| Runs of homozygosity (ROH)                 | 1 | 1 | 1 | 1 |
| Bioinformatics analysis and co-segregating | 1 | 1 | 1 | 1 |

\*Index patient.

**Supplementary Table S2. 40 PCD-related genes for filter<sup>1-8</sup>**

| PCD genes            | Chromosomal location | Ciliary structural defect                              | OMIM   |
|----------------------|----------------------|--------------------------------------------------------|--------|
| DNAH5                | 5p15.2               | ODA defect                                             | 603335 |
| DNAI1                | 9p21-p13             | ODA defect                                             | 604366 |
| DNAI2                | 17q25                | ODA defect                                             | 605483 |
| DNAL1                | 14q24.3              | ODA defect                                             | 614017 |
| TXNDC3<br>(NME8)     | 7p14-p13             | Partial ODA defect                                     | 607421 |
| CCDC114              | 19q13.32             | ODA defect                                             | 615038 |
| CCDC151              | 19q13.32             | ODA defect                                             | 615956 |
| ARMC4                | 10p12.1-p11.23       | ODA defect                                             | 615408 |
| DNAAF1<br>(LRRC50)   | 16q24.1              | ODA and IDA defect                                     | 613190 |
| DNAAF2<br>(KTU)      | 14q21.3              | ODA and IDA defect                                     | 612517 |
| DNAAF3<br>(C19ORF51) | 19q13.42             | ODA and IDA defect                                     | 614566 |
| CCDC103              | 17q21.31             | ODA and IDA defect                                     | 614677 |
| C21orf59             | 21q22.1              | ODA and IDA defect                                     | 615494 |
| DYX1C1               | 15q21.3              | ODA and IDA defect                                     | 608706 |
| LRRC6                | 8q24                 | ODA and IDA defect                                     | 614930 |
| HEATR2               | 7p22.3               | ODA and IDA defect                                     | 614864 |
| SPAG1                | 8q22                 | ODA and IDA defect                                     | 603395 |
| ZMYND10              | 3p21.31              | ODA and IDA defect                                     | 607070 |
| CCDC39               | 3q26.33              | IDA defect + microtubular disorganization              | 613798 |
| CCDC40               | 17q25.3              | IDA defect + microtubular disorganization              | 613799 |
| CCDC65<br>(DRC2)     | 12q13.12             | Mostly normal, CA defects in small proportion of cilia | 611088 |

|                   |         |                                                                                   |        |
|-------------------|---------|-----------------------------------------------------------------------------------|--------|
| CCDC164<br>(DRC1) | 2p23.3  | Nexin (N-DRC) link missing; axonemal disorganization in small proportion of cilia | 615288 |
| RSPH1             | 21q22.3 | Mostly normal, CA defects in small proportion of cilia                            | 609314 |
| RSPH4A            | 6q22.1  | Mostly normal, CA defects in small proportion of cilia                            | 612649 |
| RSPH9             | 6p21.1  | Mostly normal, CA defects in small proportion of cilia                            | 612648 |
| HYDIN             | 16q22.2 | Normal, very occasionally CA defects                                              | 610812 |
| DNAH11            | 7p21    | Normal                                                                            | 603339 |
| CCNO              | 5q11.2  | ciliary aplasia/oligoplasia                                                       | 607752 |
| MCIDAS            | 5q11.2  | ciliary aplasia/oligoplasia                                                       | 614086 |
| DNAH8             | 6p21.1  | ODA defect                                                                        | 603337 |
| RPGR              | Xp21.1  | Mixed                                                                             | 312610 |
| OFD1              | Xq22    | Normal                                                                            | 300170 |
| RSPH3             | 6q25.3  | Central pair defect or normal                                                     | 616481 |
| GAS8              | 16q24.3 | N-DRC defect                                                                      | 605178 |
| DNAH6             | 2p11.2  | Central pair defects                                                              | 603336 |
| TTC25             | 17q21.2 | ODA defect                                                                        | 617092 |
| DNAJB13           | 11q13.4 | Central microtubules defect                                                       | 610263 |
| PIH1D3            | Xq22.3  | ODA and IDA defect                                                                | 300991 |
| CCDC11            | 18q21.1 | No morphologic defects                                                            | 614759 |
| STK36             | 2q35    | RS and CA defect                                                                  | 607652 |

ODA: outer dynein arm; IDA: inner dynein arm; CA: central apparatus; N-DRC: nexin-dynein regulatory complex; RS: radial spoke; NA: not available

## References:

- <sup>1</sup> Lobo, J., Zariwala, M. A. & Noone, P. G., Primary ciliary dyskinesia. *Semin Respir Crit Care Med* **36** 169 (2015).
- <sup>2</sup> Shapiro, A. J. *et al.*, Diagnosis, monitoring, and treatment of primary ciliary dyskinesia: PCD foundation consensus recommendations based on state of the art review. *Pediatr Pulmonol* **51** 115 (2016).
- <sup>3</sup> Olbrich, H. *et al.*, Loss-of-Function GAS8 Mutations Cause Primary Ciliary Dyskinesia and Disrupt the Nexin-Dynein Regulatory Complex. *AM J HUM GENET* **97** 546 (2015).
- <sup>4</sup> Li, Y. *et al.*, DNAH6 and Its Interactions with PCD Genes in Heterotaxy and Primary Ciliary Dyskinesia. *PLOS GENET* **12** e1005821 (2016).

- <sup>5</sup> Wallmeier, J. *et al.*, TTC25 Deficiency Results in Defects of the Outer Dynein Arm Docking Machinery and Primary Ciliary Dyskinesia with Left-Right Body Asymmetry Randomization. *AM J HUM GENET* **99** 460 (2016).
- <sup>6</sup> El, K. E. *et al.*, Mutations in DNAJB13, Encoding an HSP40 Family Member, Cause Primary Ciliary Dyskinesia and Male Infertility. *AM J HUM GENET* **99** 489 (2016).
- <sup>7</sup> Paff, T. *et al.*, Mutations in PIH1D3 Cause X-Linked Primary Ciliary Dyskinesia with Outer and Inner Dynein Arm Defects. *AM J HUM GENET* **100** 160 (2017).
- <sup>8</sup> Edelbusch, C. *et al.*, Mutation of serine/threonine protein kinase 36 (STK36) causes primary ciliary dyskinesia with a central pair defect. *HUM MUTAT* (2017).

**Supplementary Table S3: Primers for PCR validation**

| chromosome | Site     | CDS               | Gene Name     | Primer F(5'-3')        | Primer R(5'-3')         |
|------------|----------|-------------------|---------------|------------------------|-------------------------|
| Chr10      | 28233788 | c.1488delG        | <i>ARMC4</i>  | TTCTAGCCCACTCAGAGACA   | TCAGCAGGTCATCAGCAATAA   |
| Chr5       | 54529089 | c.248_249insGCCCG | <i>CCNO</i>   | GGACAACGACCA GAACCTT   | CTCTACCAGCACCTCACTTG    |
| Chr15      | 55783341 | c.384delC         | <i>DYX1C1</i> | CCTTGTGAAGTTGGGTACAAAG | AGCAGCTGGAACTCACTATC    |
| Chr9       | 34513182 | c.1562T>G         | <i>DNAH1</i>  | GCCCTAGTTCAGTCTGTCCTG  | CATTTAGCCCTTATTCCTATCAC |

**Supplementary Table S4. The coverage of the 40 known PCD genes by the exome capture kit in PCD patients**

| GeneName         | P1 | P2       | P3 | P4 | P5       | P6       |
|------------------|----|----------|----|----|----------|----------|
| MCIDAS           | 1  | 1        | 1  | 1  | 1        | 1        |
| CCNO             | 1  | 1        | 1  | 1  | 1        | 1        |
| DNAAF3(C19ORF51) | 1  | 1        | 1  | 1  | 1        | 1        |
| DYX1C1           | 1  | 1        | 1  | 1  | 1        | 1        |
| DNAI1            | 1  | 1        | 1  | 1  | 1        | 1        |
| RPGR             | 1  | 1        | 1  | 1  | 1        | 1        |
| CCDC151          | 1  | 1        | 1  | 1  | 1        | 1        |
| DNAI2            | 1  | 1        | 1  | 1  | 1        | 1        |
| RSPH1            | 1  | 1        | 1  | 1  | 1        | 1        |
| DNAL1            | 1  | 1        | 1  | 1  | 1        | 1        |
| CCDC40           | 1  | 1        | 1  | 1  | 1        | 1        |
| DNAAF1(LRRC50)   | 1  | 1        | 1  | 1  | 1        | 1        |
| GAS8             | 1  | 1        | 1  | 1  | 0.994658 | 1        |
| DNAH8            | 1  | 1        | 1  | 1  | 1        | 0.999406 |
| HYDIN            | 1  | 1        | 1  | 1  | 1        | 1        |
| RSPH4A           | 1  | 0.984203 | 1  | 1  | 1        | 1        |
| LRRC6            | 1  | 1        | 1  | 1  | 1        | 1        |
| SPAG1            | 1  | 1        | 1  | 1  | 1        | 0.997352 |
| RSPH3            | 1  | 1        | 1  | 1  | 1        | 1        |
| DNAH6            | 1  | 1        | 1  | 1  | 1        | 1        |
| CCDC39           | 1  | 1        | 1  | 1  | 1        | 1        |
| HEATR2           | 1  | 0.995946 | 1  | 1  | 0.979189 | 0.99027  |
| CCDC164(DRC1)    | 1  | 1        | 1  | 1  | 1        | 1        |
| C21orf59         | 1  | 1        | 1  | 1  | 1        | 1        |
| DNAH5            | 1  | 1        | 1  | 1  | 1        | 1        |
| OFD1             | 1  | 1        | 1  | 1  | 1        | 1        |
| TXNDC3(NME8)     | 1  | 1        | 1  | 1  | 1        | 1        |

|              |          |          |          |          |          |          |
|--------------|----------|----------|----------|----------|----------|----------|
| CCDC103      | 1        | 1        | 1        | 1        | 1        | 1        |
| RSPH9        | 1        | 1        | 1        | 1        | 1        | 1        |
| DNAH11       | 1        | 1        | 1        | 1        | 1        | 1        |
| CCDC114      | 1        | 1        | 1        | 1        | 1        | 1        |
| CCDC65(DRC2) | 1        | 1        | 1        | 1        | 1        | 1        |
| DNAAF2(KTU)  | 1        | 1        | 1        | 1        | 1        | 1        |
| ZMYND10      | 1        | 1        | 1        | 1        | 1        | 1        |
| ARMC4        | 0.978439 | 0.992735 | 0.993204 | 1        | 0.998125 | 1        |
| TTC25        | 1        | 0.998691 | 0.994108 | 0.990507 | 0.997709 | 0.997381 |
| DNAJB13      | 1        | 1        | 1        | 1        | 1        | 1        |
| PIH1D3       | 1        | 1        | 1        | 1        | 1        | 1        |
| CCDC11       | 1        | 1        | 1        | 1        | 1        | 1        |
| STK36        | 1        | 1        | 1        | 1        | 1        | 1        |



**Supplementary Table S5. Frequencies of the identified variants in database**

|                                             | dbSNP138    | 1000G  | ESP6500 | ExAC   | ClinVar |
|---------------------------------------------|-------------|--------|---------|--------|---------|
| <i>ARMC4</i> (c.1488delG/p.E497Kfs*3)       | 0           | 0      | 0       | 0      | 0       |
| <i>CCNO</i> (c.248_249ins GCCCG/p.Q88Rfs*8) | 0           | 0      | 0       | 0.0003 | 0       |
| <i>DYX1C1</i> (c.384delC/p.Y128*)           | 0           | 0      | 0       | 0      | 0       |
| <i>DNAI1</i> (c.1562T>G/p.I521S)            | rs568312736 | 0.0002 | 0       | 0      | 0       |

dbSNP138: The Single Nucleotide Polymorphism database 138; 1000G: 1000 Genomes Project 2014 oct; ESP6500: NHLBI-ESP 6500 exomes database; ExAC: The Exome Aggregation Consortium
